# Supplementary material
Source: publisher figshare collection journal article supplement (https://frontiersin.figshare.com/ndownloader/files/12431588)

**Suppl Fig 1.** Increase in abundance of the genus *Lactobacillus*, indicative of MPTP as revealed by LefSe.

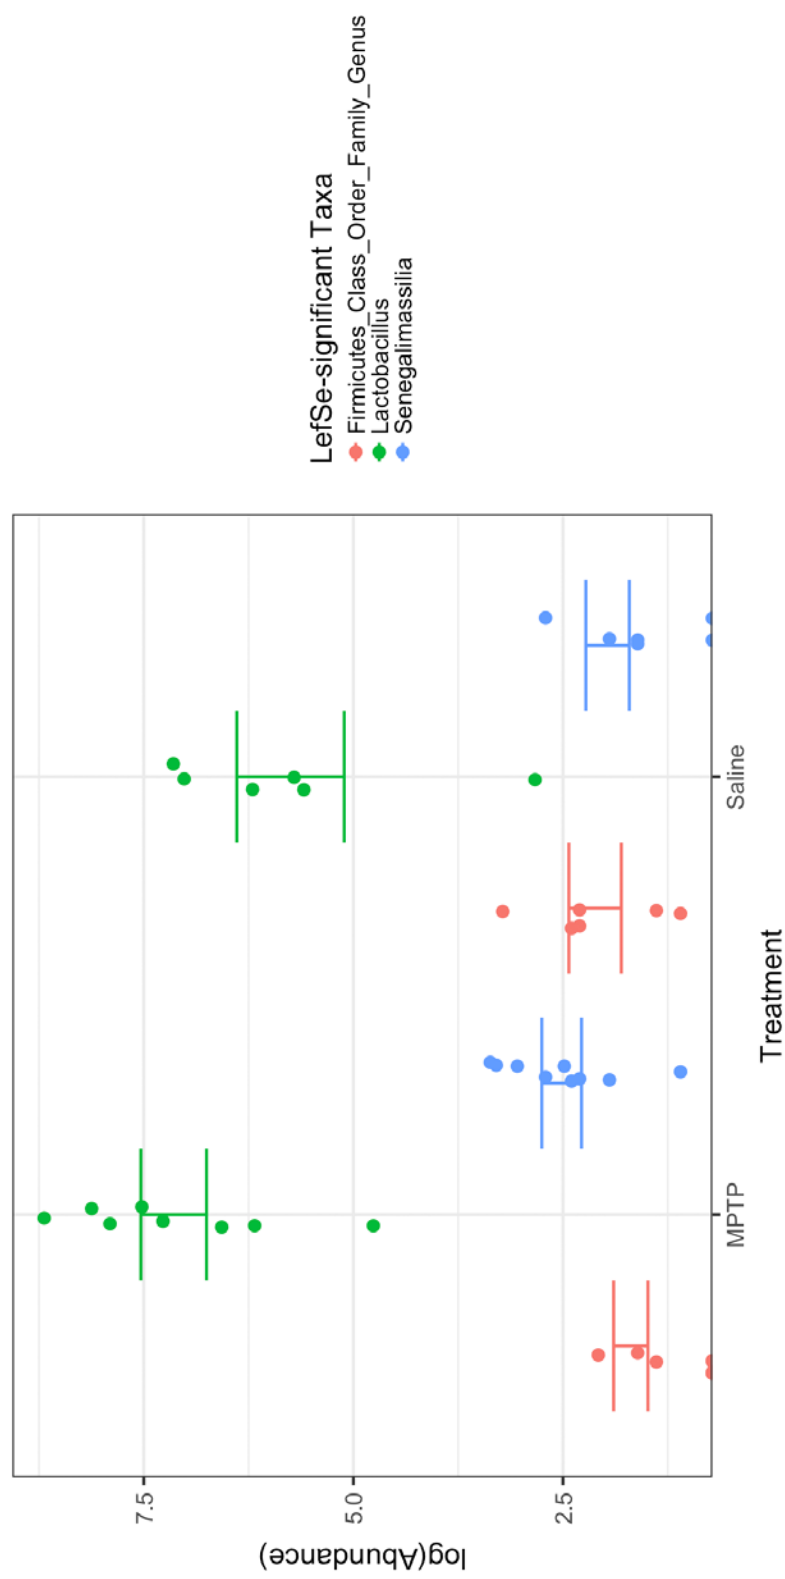

Supplement: Supplementary file [file 12431588]
